# Supplementary material
Source: publisher site journal article supplement (https://www.dovepress.com/get_supplementary_file.php?f=400808.docx)
Supplement: Supplementary file 1 [file get_supplementary_file.php]

**Supplementary Figures**


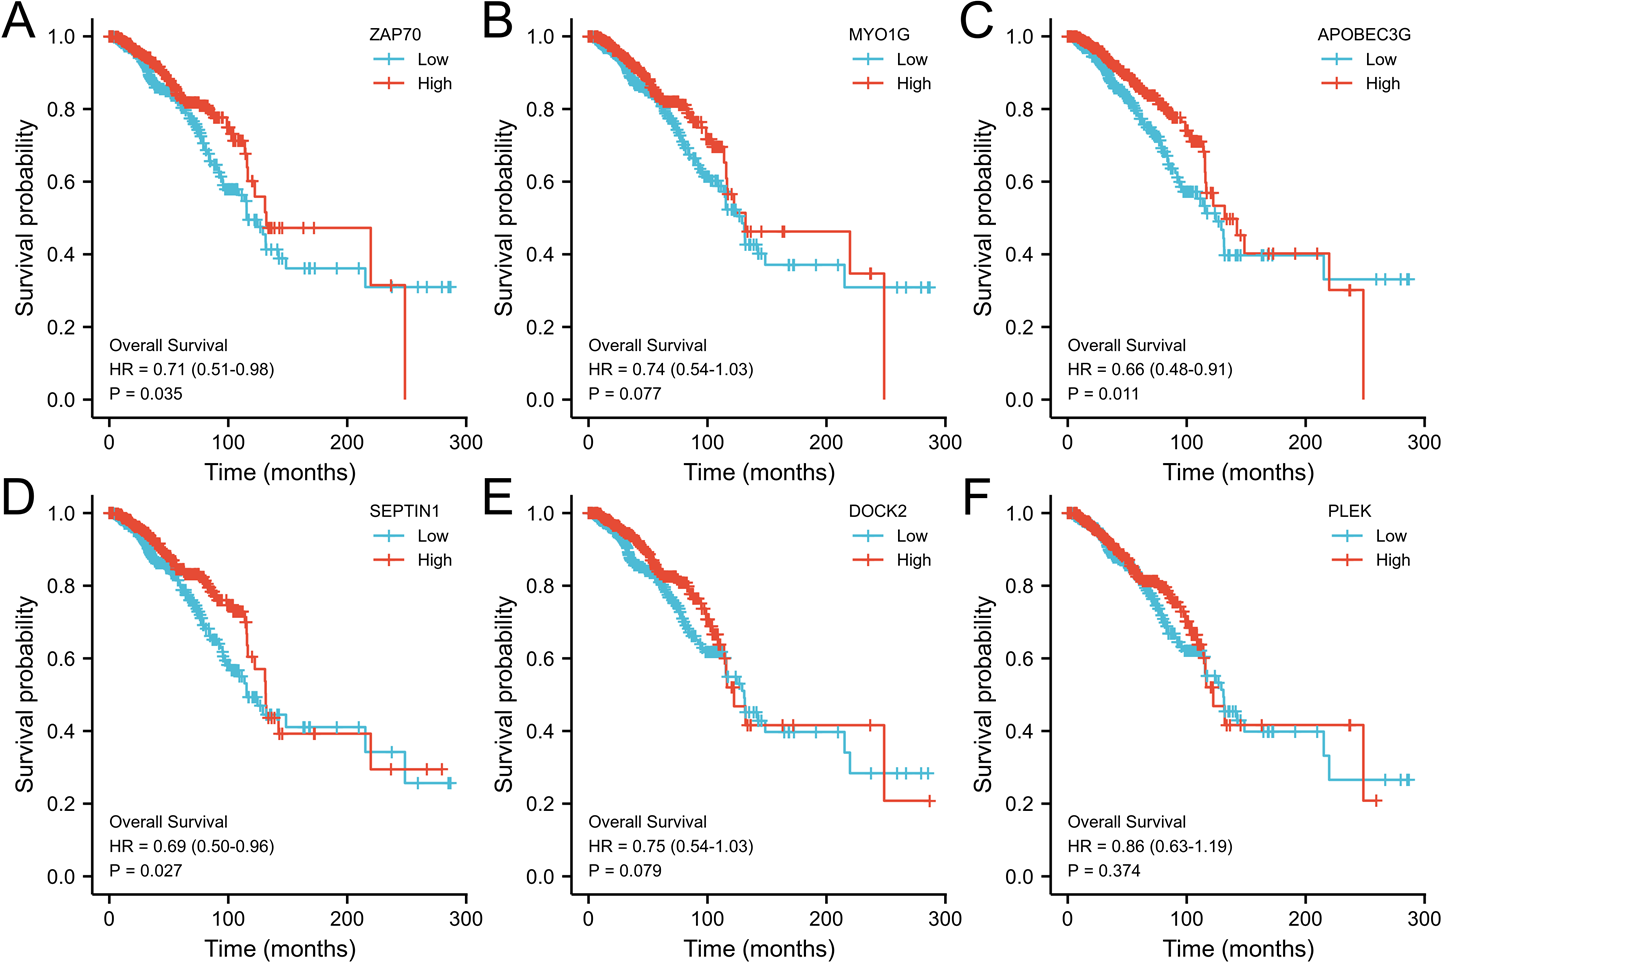


**Supplementary Figure 1. The association between** ***GZMA* expression and co-expressed genes and prognosis of breast cancer.** (A) *ZAP70*; (B) *MYO1G*; (C) *APOBEC3G*; (D) *SEPT1*; (E) *DOCK2*; and (F) *PLEK.*


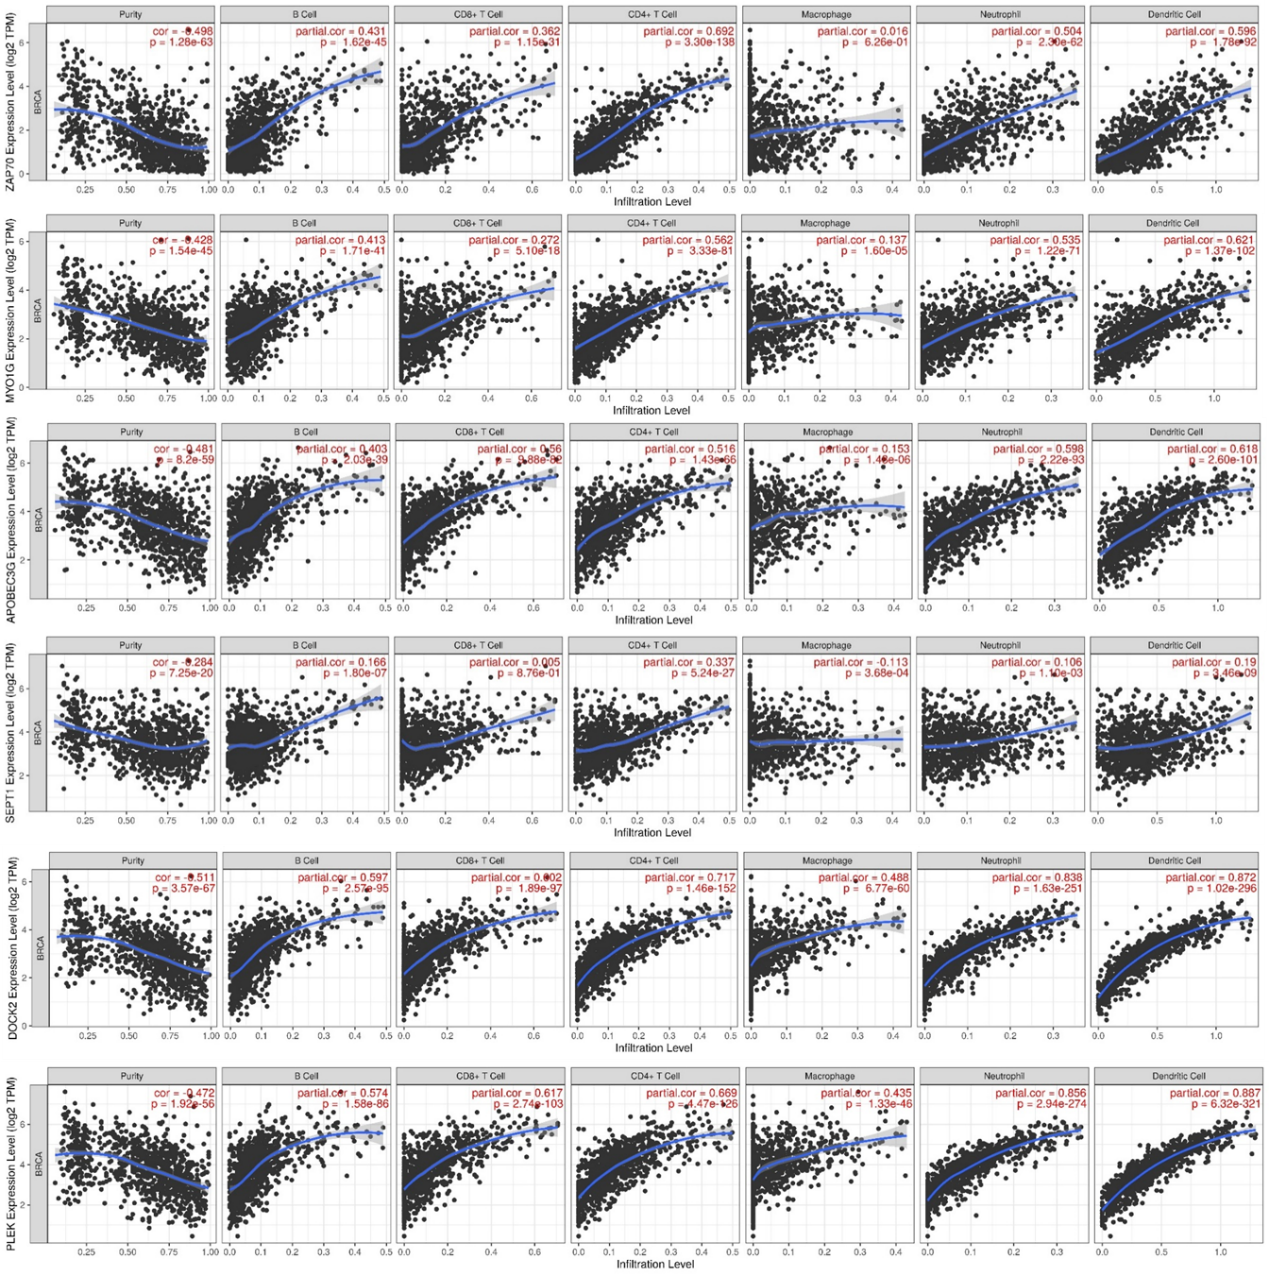


**Supplementary Figure 2. The correlation between *GZMA* expression and co-expressed genes on immune infiltration levels in breast cancer using the TIMER database.**
